# Supplementary material for: Evaluation of Postgraduate Foundation Training for Dental Therapists: Does participation enhance career prospects?
Source: Research Square preprint supplement (doi:10.21203/rs.3.rs-3655926/v1), 2023-12-04
Supplement: Supplementary file 1 [file 2ecfeb9f82d921b5676e9f0b.docx]

**Table 2:** Demographic, training and working practices of DTs.

| **Demographic** | **Group A Frequency (n)** | | **Group A Percentage (%)** | **Group B Frequency (n)** | **Group B Percentage (%)** | | | | |
| --- | --- | --- | --- | --- | --- | --- | --- | --- | --- |
| **Sex** |  | |  |  |  | | | | |
| Female | 57 | | 93.4 | 31 | 93.9 | | | | |
| Male | 4 | | 6.6 | 2 | 6.1 | | | | |
| Non-binary | 0 | | 0 | 0 | 0 | | | | |
| Prefer not to say | 0 | | 0 | 0 | 0 | | | | |
| **Age (years)** |  | |  |  |  | | | | |
| 19-24 | 8 | | 13.1 | 3 | 9.1 | | | | |
| 25-34 | 28 | | 45.9 | 19 | 57.7 | | | | |
| 35-44 | 20 | | 32.8 | 8 | 24.2 | | | | |
| 45-54 | 4 | | 6.6 | 1 | 3.0 | | | | |
| 55-64 | 0 | | 0 | 2 | 6.0 | | | | |
| Undisclosed | 1 | | 1.6 | 0 | 0 | | | | |
| **Qualification (type)** |  | |  |  |  | | | | |
| Bachelor of Science (Dental Hygiene and Dental Therapy) | 30 | | 49.2 | 17 | 51.5 | | | | |
| Bachelor of Science (Oral Health Sciences) | 9 | | 14.8 | 5 | 15.2 | | | | |
| Diploma in Dental Hygiene and Dental Therapy | 21 | | 34.4 | 11 | 33.3 | | | | |
| Diploma in Orthodontic Therapy | 1 | | 1.6 | 0 | 0 | | | | |
| **DTFT Deanery** |  | |  |  |  | | | | |
| Education for Scotland | | - | - | 2 | 6.06 | | | | |
| Health Education & Improvement Wales | | - | - | 6 | 18.18 | | | | |
| Health Education South East (KSS) | | - | - | 3 | 9.09 | | | | |
| Health Education Midlands and East | | - | - | 1 | 3.03 | | | | |
| North West Deanery | | - | - | 2 | 6.06 | | | | |
| Thames Valley & Wessex Deanery | | - | - | 12 | 36.37 | | | | |
| West Midlands Deanery | | - | - | 4 | 12.12 | | | | |
| Yorkshire & Humber Deanery | | - | - | 2 | 6.06 | | | | |
| Undisclosed | | - | - | 1 | 3.03 | | | | |
| **Training Institute** |  | |  |  |  | | | | |
| University of Portsmouth | 10 | | 16.4 | 5 | 15.2 | | | | |
| University of Birmingham | 6 | | 9.8 | 4 | 12.2 | | | | |
| King’s College London | 5 | | 8.3 | 1 | 3.0 | | | | |
| University of Leeds | 5 | | 8.3 | 5 | 15.2 | | | | |
| Teesside University | 3 | | 4.9 | 2 | 6.1 | | | | |
| Other | 19 | | 31.0 | 10 | 30.1 | | | | |
| Undisclosed | 13 | | 21.3 | 6 | 18.2 | | | | |
| **Main Work Setting** |  | |  |  |  | | | | |
| General Dental Practice (Mixed) | 27 | | 44.3 | 13 | 39.3 | | | | |
| Private General Practice | 26 | | 42.5 | 7 | 21.3 | | | | |
| NHS General Practice | 2 | | 3.3 | 3 | 9.1 | | | | |
| Hospital Dental Services | 2 | | 3.3 | 1 | 3.0 | | | | |
| Community Dental Services | 2 | | 3.3 | 6 | 18.2 | | | | |
| Other | 2 | | 3.3 | 3 | 9.1 | | | | |
| **Working Commitment** |  | |  |  |  | | | | |
| Full-Time | 37 | | 60.7 | 18 | 54.5 | | | | |
| Part-Time | 23 | | 37.7 | 14 | 42.4 | | | | |
| Career Break | 1 | | 1.6 | 1 | 3.0 | | | | |
| **Main Patient Group** |  | |  |  |  | | | | |
| Adults | 36 | | 59.0 | 9 | 28.1 | | | | |
| Children | 1 | | 1.6 | 0 | 0 | | | | |
| Mixture of Both | 24 | | 39.3 | 23 | 71.9 | | | | |
| **Main Working Distribution** |  | |  |  |  | | | | |
| Periodontal Treatment | 32 | | 52.5 | 14 | 43.8 | | | | |
| Restorative Treatment | 2 | | 3.3 | 5 | 15.6 | | | | |
| Mixture of Both | 27 | | 44.3 | 13 | 40.6 | | | | |
| Table 2: There was a range of demographic detail, training, and working practices across both groups. | | | | | |  |  |  |  |
