# Supplementary material for: Evaluation of Postgraduate Foundation Training for Dental Therapists: Does participation enhance career prospects?
Source: Research Square preprint supplement (doi:10.21203/rs.3.rs-3655926/v1), 2023-12-04
Supplement: Supplementary file 2 [file 509fd6c3d5283fd4e78071cc.docx]

**Table 1.** Current and future DTFT schemes and Deaneries.

|  | **Scheme and Deanery** | **Website / information** | | |
| --- | --- | --- | --- | --- |
| 1 | NHS Education for Scotland | https://www.nes.scot.nhs.uk/media/fxocsrly/final-nes-tvt-guide.pdf | | |
| 2 | Health Education and Improvement Wales | https://heiw.nhs.wales/education-and-training/dental/training-programmes/welsh-dental-therapy-foundation-training-programme-wdtft/ | | |
| 3 | Health Education East of England | https://heeoe.hee.nhs.uk/node/7896 | | |
| 4 | Health Education England London | https://london.hee.nhs.uk/dental/dental-foundation-therapy | | |
| 5 | Health Education Midlands and East | <https://heeoe>.hee.nhs.uk/dental/dental-therapist-foundation-training | | |
| 6 | North East and North Cumbria Deanery | <https://madeinheene>.hee.nhs.uk/dental_training/Dental-Therapists | | |
| 7 | North West Deanery | <https://www>.nwpgmd.nhs.uk/dental-therapist-foundation-training-scheme | | |
| 8 | HEE South West Deanery | https://dental.southwest.hee.nhs.uk/about-us/dental-foundation-therapist-programme/ | | |
| 9 | Thames Valley and Wessex Deanery (Oxford) | <https://thamesvalley>.hee.nhs.uk/dental-directorate-thames-valley-and-wessex/therapist-training/ | | |
| 10 | Yorkshire and Humber Deanery | <https://yorksandhumberdeanery>.nhs.uk/dentistry/programme/dental_therapy_foundation_training | | |
| Table 1: DTFT schemes active in academic year 2022-2023 or anticipated 2023-2024. | | |  |  |
