# Supplementary material for: Evaluation of Postgraduate Foundation Training for Dental Therapists: Does participation enhance career prospects?
Source: Research Square preprint supplement (doi:10.21203/rs.3.rs-3655926/v1), 2023-12-04
Supplement: Supplementary file 3 [file 8e62f620971a3ec62ccfb724.docx]

**Table 4.** Common barriers faced by DTs seeking job opportunities.

| **Barrier** | **Group 1 %** | **Group 2 %** | | |
| --- | --- | --- | --- | --- |
| 1. NHS contract not suitable for implementation of therapy (UDA) | 40.0% | 58.3% | | |
| 1. Dentists reluctant or unwilling to refer work to a DT | 80.0% | 58.3% | | |
| 1. Practices seeking hygienist only roles | 87.5% | 75.0% | | |
| 1. Inadequate time and provision to provide restorative treatment | 47.5% | 37.5% | | |
| 1. No nursing support available to facilitate restorative treatment | 35.0% | 41.7% | | |
| 1. I have deskilled and I am under-confident in my restorative ability | 25.0% | 29.2% | | |
| 1. Dentists don’t know how to uses DTs in practice | 2.5% | 0.0% | | |
| Table 4: Both groups reported encountering barriers when seeking job opportunities. | | |  |  |
