# Supplementary material for: Evaluation of Postgraduate Foundation Training for Dental Therapists: Does participation enhance career prospects?
Source: Research Square preprint supplement (doi:10.21203/rs.3.rs-3655926/v1), 2023-12-04
Supplement: Supplementary file 4 [file fe47af5e5f65efb2831ad758.docx]

**Table 3.** Key results of evaluation of DTFT schemes.

| **Statement** | **Strongly disagree** | | |  |  | |  | **Strongly agree** | | **Mean** | | | | **Standard Deviation** | | | | |
| --- | --- | --- | --- | --- | --- | --- | --- | --- | --- | --- | --- | --- | --- | --- | --- | --- | --- | --- |
|  | **1** | **2** | **3** | | | **4** | | | **5** |  | | | |  | | | | |
| 1. The study days were well matched to my learning needs. | 1 | 1 | 7 | | | 12 | | | 12 | 4.00 | | | | 1.000 | | | | |
| 1. I felt that I was well integrated and accepted in practice during my foundation training. | 0 | 1 | 3 | | | 4 | | | 23 | 4.58 | | | | .792 | | | | |
| 1. My trainer provided good support whilst I was in training. | 0 | 3 | 3 | | | 7 | | | 20 | 4.33 | | | | .990 | | | | |
| 1. The learning portfolios helped me to track and reflect on my progress. | 1 | 4 | 5 | | | 13 | | | 10 | 3.82 | | | | 1.103 | | | | |
| 1. As a result of completing foundation training, I have benefited by being able to integrate more into mixed-skill dental teams. | 1 | 0 | 10 | | | 8 | | | 14 | 4.03 | | | | 1.015 | | | | |
| Table 3: Those who completed DTFT reported a positive learning experience. | | | | | | | | | | |  |  |  | |  |  |  |  |
